# Supplementary material
Source: PubMed Central journal article supplement (PMC9642783)
Supplement: bloodBLD2021012428-suppl1.pdf [file bloodBLD2021012428-suppl1.pdf]

## **Supplementary information**

### **Methodology**

**Mice and experimental in vivo procedures** – B cell depletion is achieved in hCD20Tg mice upon intraperitoneal injection of 1mg/mouse of purified monoclonal mouse anti-hCD20 (clone 2H7) <sup>1</sup>. Three days after injection, B cell depletion was confirmed by flow cytometry analysis of peripheral blood cells. In some experiments, purified splenic B cells ( $30 \times 10^6$  cells/mouse) were adoptively transferred to B-cell depleted mice by intravenous injection. For inducible ablation of recombination activating gene 2 (RAG-2) in some experiments, we used Rag-2fl/fl mice <sup>2</sup>, crossed with Mx-cre transgenic mice <sup>3</sup>, where ablation of the floxed alleles *in vivo* is obtained upon administration of poly(I)-poly(C) on days 0, 3 and 7 <sup>4</sup>. In some experiments, mice were injected subcutaneously with recombinant hIGF1 (2mg/kg) or hGH (0.36mg/kg) twice a day for 10 days. Control group received PBS only. Mice were maintained at the Animal Care-certified facility at the Faculty of Medicine, Technion (ISRAEL) and all studies were approved by the institute's committee for the supervision of animal experiments.

**Flow Cytometry and cell stain for mouse and human cells** - Single-cell suspensions, following red blood cell lysis, from mouse BM and spleen were stained with fluorescently labeled antibodies for surface proteins to identify specific B cell subsets. Antibodies used were anti-CD93-APC (AA4.1), anti-B220-PB (RA3-6B2), anti-CD23-PE (B3B4), anti-CD43-PE-Cy7 (S11) (all from BioLegend), anti-IgM-FITC ( $\mu$ -chain specific) from Jackson and anti-CD21-BV421 (7G6) from eBioscience. Human PBMCs were isolated by Ficoll® density gradient centrifugation per standard protocol and stained with the following antibodies: anti-CD38-PE (HB7), anti-CD24-APC (ML5) (from BioLegend) anti-CD19-FITC (4G7) (from BD). Data was acquired on LSRFortessa (BD Pharmingen) and analyzed using FlowJo software (Tree Star).

**Human blood collection and clinical study details** – For the clinical study IRB 0643-15 RMB to determine the role of TNF $\alpha$ /anti-TNF $\alpha$  treatments in regulating B lymphopoiesis in humans, we recruited patients with inflammatory joint diseases (IJD): rheumatoid arthritis (RA), psoriatic arthritis (PsA), and spondyloarthritis (SPA). Exclusion criteria included another inflammatory joint disease or immunomodulatory conditions such as positivity to hepatitis C, hepatitis B or HIV. Blood samples were taken from patients naive to anti-TNF $\alpha$  therapy (IJD-NB) and from patients undergoing anti-TNF $\alpha$  therapy for at least three months (cross-sectional group, IJD-TNF). A subset of patients was analyzed upon initiation of anti-TNF $\alpha$  therapy and three months later (longitudinal group) and therefore are represented in the both, IJD-NB and IJD-TNF groups. The control group

consisted of patients with no inflammatory conditions; healthy volunteers or patients with degenerative osteoarthritis were included. Patients enrolled in the cross-sectional analysis belong to the groups control, IJD-NB, and IJD-TNF. Patients enrolled in the longitudinal, prospective cohort study also belong to the groups IJD-NB and IJD-TNF. These patients serve as their own controls as their blood samples were analyzed before and at least three months after initiation of anti-TNF $\alpha$  therapy. After collection, fresh blood samples were immediately transferred to the immunology laboratory and analyzed to quantify transitional B cells and soluble molecules in plasma.

Quantitative PCR - Expression of TNF $\alpha$  mRNA in B cells was determined by quantitative PCR using Sybr Green MasterMix (BioRad) and a BioRad CFX connect Real-Time PCR <sup>22</sup>. Samples were normalized with GAPDH gene amplification and DATA were analyzed using the CFX Manager Software. The primer sequences are:

|       | Primer name        | Sequence                | Length |
|-------|--------------------|-------------------------|--------|
| Mouse | TNF $\alpha$ - FW  | CCCTCACACTCAGATCATCTTCT | 23     |
|       | TNF $\alpha$ - REV | GCTACGACGTGGGCTACGA     | 19     |
|       | GAPDH - FW         | TGACCACAGTCCATGCCATC    | 20     |
|       | GAPDH - REV        | GACGGACACATTGGGGGTAG    | 20     |
| Human | TNF $\alpha$ FW    | GAGGCCAAGCCCTGGTATG     | 19     |
|       | TNF $\alpha$ REV   | CGGGCCGATTGATCTCAGC     | 19     |
|       | GAPDH - FW         | ATGGGGAAGGTGAAGGTCG     | 19     |
|       | GAPDH - REV        | GGGGTCATTGATGGCAACAATA  | 22     |

*Serum and plasma analysis for IGF1, IGFBP-1 and TNF $\alpha$ :*

Levels of IGF1, IGFBP-1 and TNF $\alpha$  in mouse sera and human plasma were determined by enzyme-linked immunosorbent assay (ELISA). For human and mouse IGF1, a sandwich ELISA was set using capture antibodies (Goat Anti-Murine IGF1, or Rabbit Anti-Human IGF1 (1 $\mu$ g/ml)) and detecting antibodies (biotinylated anti-Murine IGF1, or biotinylated Anti-Human IGF1), according

the manufacturer protocol (Peprotech). For human and mouse TNF $\alpha$  in we used Mini ELISA development kit for murine TNF $\alpha$  (Peprotech 900-M54) or mini TMB EDK kit for human TNF $\alpha$  (Peprotech 900-TM25). For human and mouse IGFBP-1 we used mouse IGFBP-1 PicoKine™ ELISA Kit (BOSTER EK0383) or mini ABST EDK Human IGFBP-1 kit (Peprotech 900-M315). Total IGF1, TNF $\alpha$  and IGFBP-1 concentrations were calculated using a reference standard curve of purified recombinant TNF $\alpha$ , IGF1 or IGFBP-1.

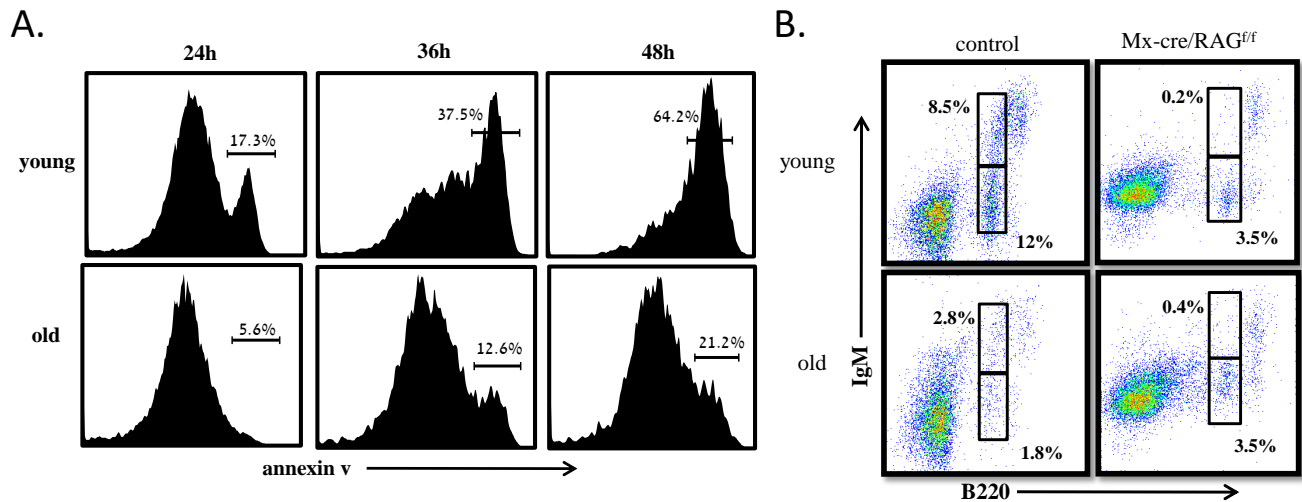

*Supplementary Figure 1 – Survival of peripheral B cells.* (A) – splenic B cells from the indicated mice were cultured untreated for the indicated time intervals, collected and analyzed for apoptosis by annexin V stain. Shown are representative kinetic measurements of accumulated spontaneous apoptosis for a single experiment out of three independent experiments. (B) – Mice with the indicated genetic background, old or young, were treated with poly(I)(C) to ablate RAG-floxed alleles. Seventeen weeks later BMs of the indicated mice were analyzed for B lymphopoiesis with gates set to identify pro/pre and immature B cells. Shown are representative plots for individual mice with the indicated genotypes (n=5 in each group).

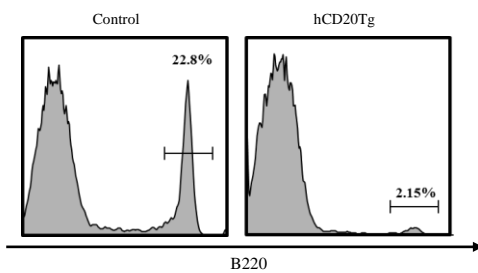

*Supplementary Figure 2 – Peripheral B cell depletion.* The indicated mice were injected intraperitoneal with mouse-anti-human CD20 monoclonal antibodies to deplete peripheral B cells. Three days after injection, mice were bled and B cell depletion was confirmed by flow cytometry analysis of peripheral blood cells. Results shown are representative of at least 20 individual mice in each group.

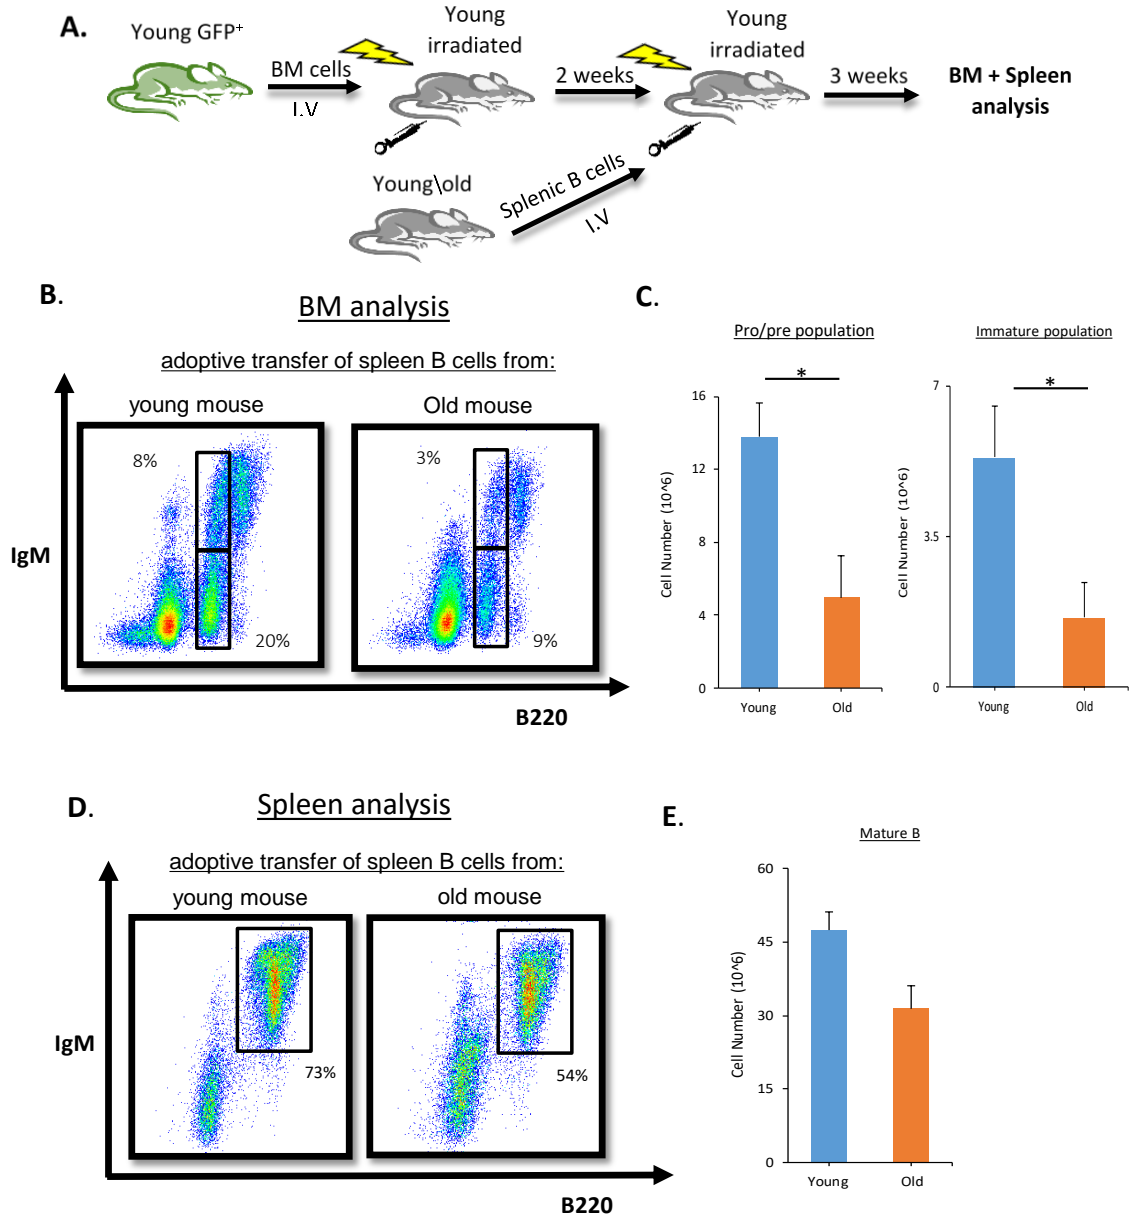

*Supplementary Figure 3 – Peripheral B cells from old mice suppress B lymphopoiesis.* Young WT mice were lethally irradiated, followed by reconstitution with total BM cells from young GFP transgenic mice. After two weeks the GFP-chimeric mice were intravenously injected with  $15 \times 10^6$  splenic B cells isolated from young or old WT mice. Three weeks later BM and spleens of recipient mice were analyzed for B lymphopoiesis. (A) Experimental scheme. (B and C) – Analysis of BM cells (GFP+) for the indicated mice was performed by FACS with gates set for pro/pre and immature B cells. Shown are representative plots for a single mouse from each group (B), and absolute cell numbers (C). Graph depicts mean from 3 mice in each group  $\pm$ SE. (D and E) Analysis of spleen cells for the indicated mice with gates set to quantify newly-generated host B cells (GFP+) as B220+/IgM+. Shown are representative plots for individual mice from each group (D), and absolute cell numbers (E). Graph depicts mean from 3 mice in each group  $\pm$ SE.

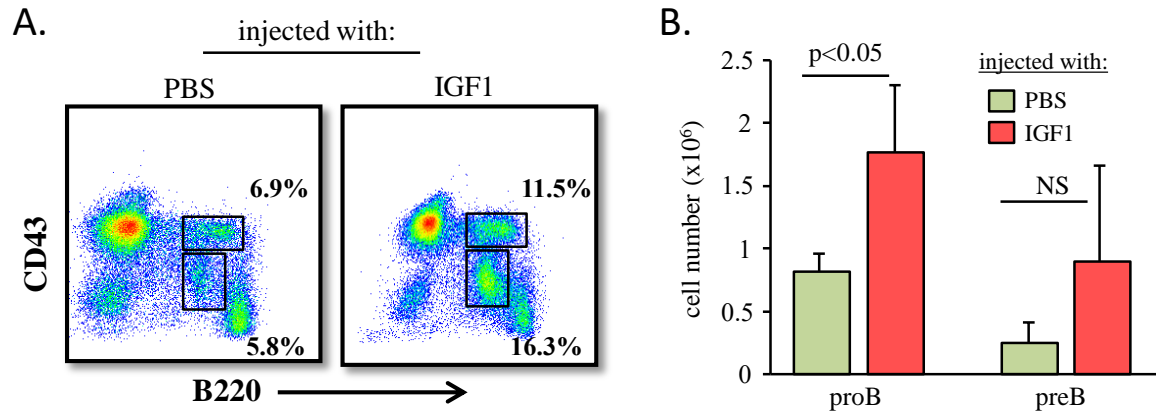

*Supplementary Figure 4 - B lymphopoiesis in aging is regulated by IGF1.* Old mice were subcutaneously injected with hIGF-1 for 10 days. Control mice were injected with PBS. One day after last injection we analyzed BM of the mice for B lymphopoiesis with gates set to identify proB and preB cell subsets. Shown are representative plots for a single mouse from each group (A), and absolute cell numbers for proB and preB cell populations (B). Graph depicts mean from 5 mice in each group  $\pm$ SE.

1. Ahuja A, Shupe J, Dunn R, Kashgarian M, Kehry MR, Shlomchik MJ. Depletion of B cells in murine lupus: efficacy and resistance. *J Immunol.* 2007;179(5):3351-3361.
2. Hao Z, Rajewsky K. Homeostasis of Peripheral B Cells in the Absence of B Cell Influx from the Bone Marrow. *The Journal of Experimental Medicine.* 2001;194(8):1151-1164.
3. Berg DJ, Leach MW, Kuhn R, et al. Interleukin 10 but not interleukin 4 is a natural suppressant of cutaneous inflammatory responses. *J Exp Med.* 1995;182(1):99-108.
4. Avivi I, Zisman-Rozen S, Naor S, et al. Depletion of B cells rejuvenates the peripheral B-cell compartment but is insufficient to restore immune competence in aging. *Aging Cell.* 2019;18(4):e12959.
